# Supplementary material for: GLP-1 alleviates NLRP3 inflammasome-dependent inflammation in perivascular adipose tissue by inhibiting the NF-κB signalling pathway
Source: PubMed Central journal article supplement — J Int Med Res. 2021 Feb 27;49(2):0300060521992981. doi: 10.1177/0300060521992981 (PMC7917887; doi:10.1177/0300060521992981), 2021-02-27
Supplement: sj-pdf-1-imr-10.1177_0300060521992981.pdf [file sj-pdf-1-imr-10.1177_0300060521992981.pdf]

This document certifies that the manuscript

## **GLP-1 Alleviates NLRP3 Inflammasome-dependent Inflammation in Perivascular Tissue by Inhibiting the NF- $\kappa$ B signaling pathway**

prepared by the authors

**Xiangheng Chen , Qiuling huang, Juling Feng, Zhongsheng Xiao, Xiaoling Zhang, Lei Zhao**

was edited for proper English language, grammar, punctuation, spelling, and overall style by one or more of the highly qualified native English speaking editors at AJE.

This certificate was issued on **December 13, 2018** and may be verified on the [AJE website](#) using the verification code **8F91-BE4F-9563-BD4A-58EP** .

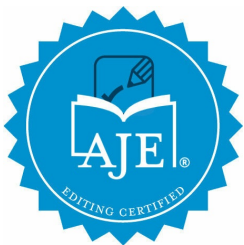

Neither the research content nor the authors' intentions were altered in any way during the editing process. Documents receiving this certification should be English-ready for publication; however, the author has the ability to accept or reject our suggestions and changes. To verify the final AJE edited version, please visit our verification page at [aje.com/certificate](#). If you have any questions or concerns about this edited document, please contact AJE at [support@aje.com](mailto:support@aje.com).
